# Supplementary material
Source: MDPI journal article supplement (https://www.mdpi.com/2073-4344/11/9/1079)
Supplement: s1 [file s1 › catalysts-1357804-supplementary.pdf]

# Low-temperature hydrogenation of toluene using an iron-promoted molybdenum carbide catalyst

Song Zhou<sup>1,2</sup>, Xi Liu<sup>3,4,\*</sup>, Jian Xu<sup>3,\*</sup>, Hui Zhang<sup>5</sup>, Xiaosong Liu<sup>5</sup>, Pengcheng Li<sup>6</sup>, Xiaodong Wen<sup>1,3</sup>, Yong Yang<sup>1,3</sup> and Yongwang Li<sup>1,3</sup>

<sup>1</sup> State Key Laboratory of Coal Conversion, Institute of Coal Chemistry, Chinese Academy of Sciences, Taiyuan 030001, P.R. China; zhousong@sxicc.ac.cn (S.Z.); wenxiaodong@synfuelschina.com.cn (X.W.); yangyong@synfuelschina.com.cn (Y.Y.); yangyong@synfuelschina.com.cn (Y.L.)

<sup>2</sup> School of Chemistry and Chemical Engineering, University of Chinese Academy of Sciences, Beijing, 100049, P.R. China

<sup>3</sup> Synfuels China Technology Co., Ltd; Syncat@Beijing, Beijing 100049, P.R. China

<sup>4</sup> In situ Center for Physical Sciences, School of Chemistry and Chemical Engineering, Shanghai Jiao Tong University, Shanghai 200240, P. R. China; liuxi@sjtu.edu.cn

<sup>5</sup> State Key Laboratory of Functional Materials for Informatics, Shanghai Institute of Microsystem and Information Technology, Chinese Academy of Sciences, Shanghai 200050, P.R. China; huizhang@mail.sim.ac.cn (H.Z.); xsliu19@ustc.edu.cn (X.L.)

<sup>6</sup> Luoyang R&D Center of Technology Sinopec Engineering (Group) Co., Ltd, Luoyang 471003, P.R. China; lipengcheng.segr@sinopec.com

\* Correspondence: xujian@synfuelschina.com.cn

**Table S1.** Textural properties and elemental compositions of the as-prepared Fe-Mo<sub>2</sub>C catalysts with different Fe loadings.

| Sample                      | Fe Doping <sup>a</sup> (at%(Fe/(Fe + Mo))) |            | Surface Area <sup>b</sup> (m <sup>2</sup> /g) |
|-----------------------------|--------------------------------------------|------------|-----------------------------------------------|
|                             | Nominal Value                              | Real Value |                                               |
| β-Mo <sub>2</sub> C         | N/A                                        | N/A        | 6.8                                           |
| 1.5Fe-Mo <sub>2</sub> C-550 | 1.5                                        | 1.5        | 8.03                                          |
| 5Fe- Mo <sub>2</sub> C-550  | 5                                          | 5.2        | 5.34                                          |
| 10Fe- Mo <sub>2</sub> C-550 | 10                                         | 10.5       | 11.88                                         |
| 15Fe- Mo <sub>2</sub> C-550 | 15                                         | 15.8       | 15.64                                         |
| 20Fe- Mo <sub>2</sub> C-550 | 20                                         | 20.7       | 25.37                                         |
| 20Fe- Mo <sub>2</sub> C-600 | 20                                         | 20.7       | 17.59                                         |
| 20Fe- Mo <sub>2</sub> C-650 | 20                                         | 20.7       | 9.30                                          |
| 20Fe- Mo <sub>2</sub> C-700 | 20                                         | 20.7       | 8.06                                          |

[a] Determined via ICP-OES. [b] Determined via N<sub>2</sub> adsorption. N/A: no data.

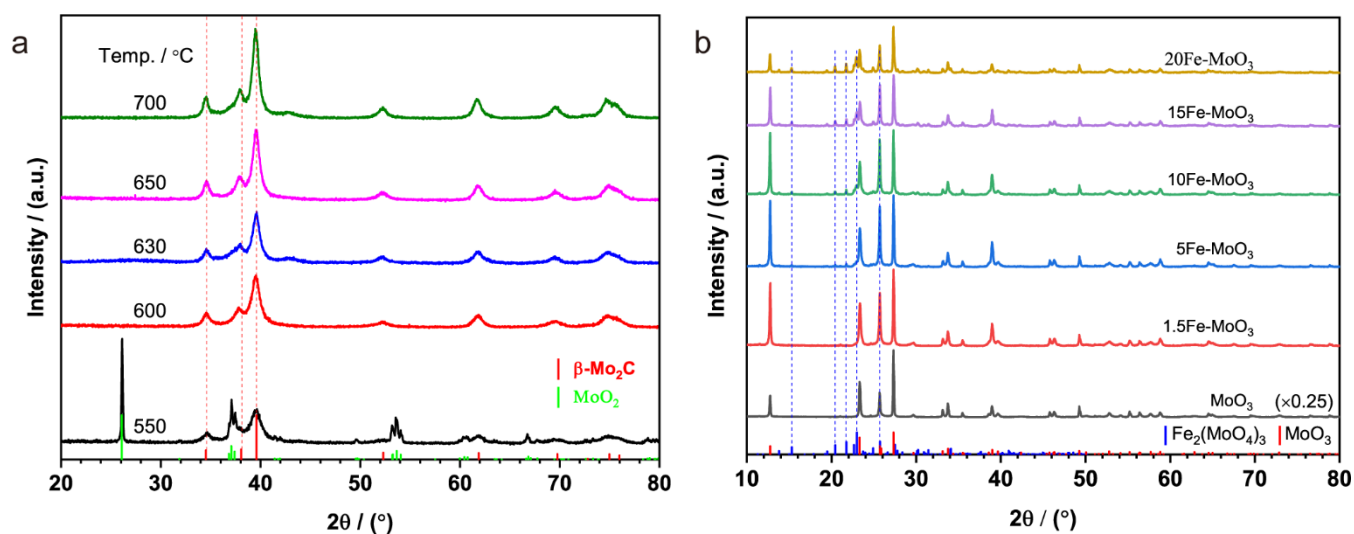

**Figure S1.** (a) XRD patterns of  $\beta$ - $\text{Mo}_2\text{C}$  prepared at different final temperatures (550 °C, 600 °C, 630 °C, 650 °C and 700 °C), (b) XRD patterns of  $\text{Fe-MoO}_3$  precursors.

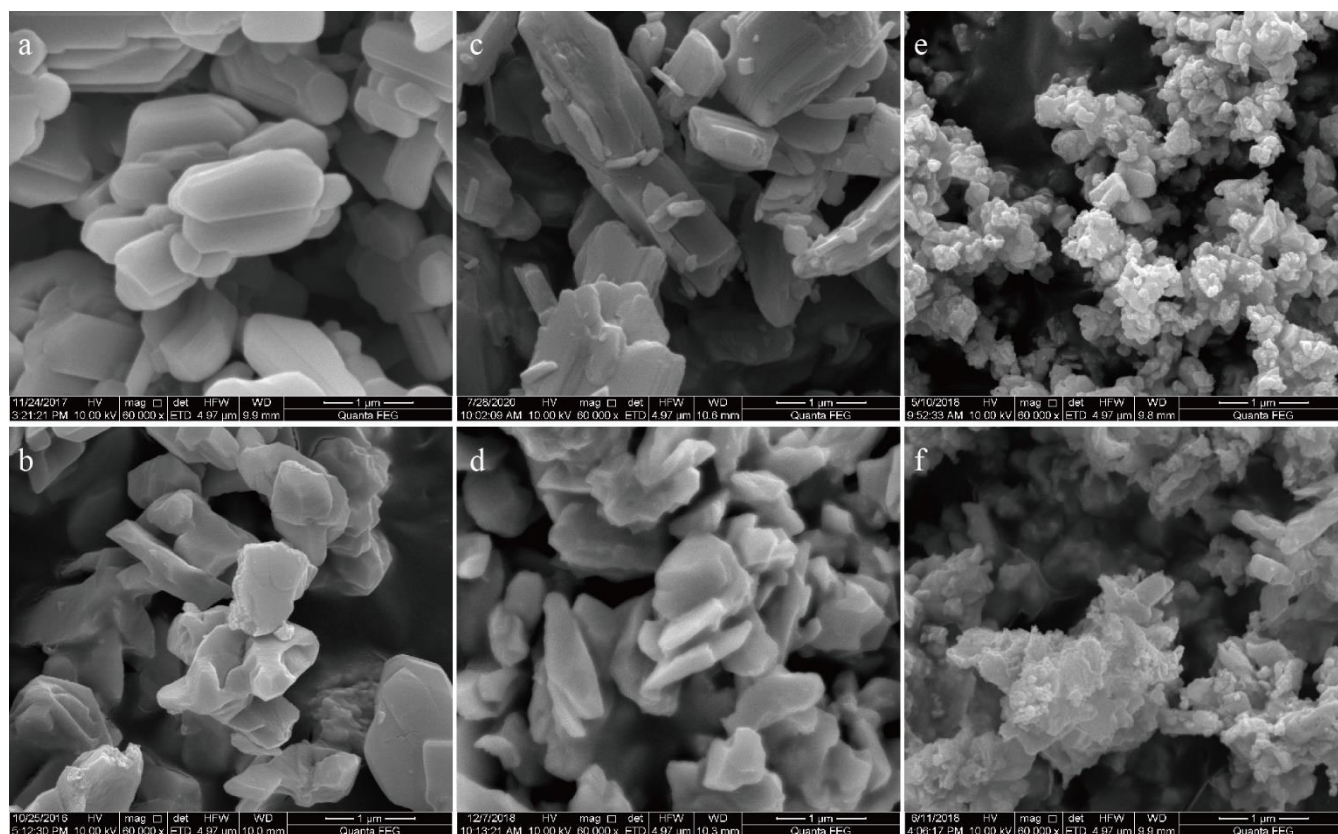

**Figure S2.** SEM images of (a)  $\text{MoO}_3$ , (b)  $\beta$ - $\text{Mo}_2\text{C}$ , (c) 1.5Fe- $\text{MoO}_3$ , (d) 1.5Fe- $\text{Mo}_2\text{C}$ -550, (e) 10Fe- $\text{MoO}_3$ , (f) 10Fe- $\text{Mo}_2\text{C}$ -550.

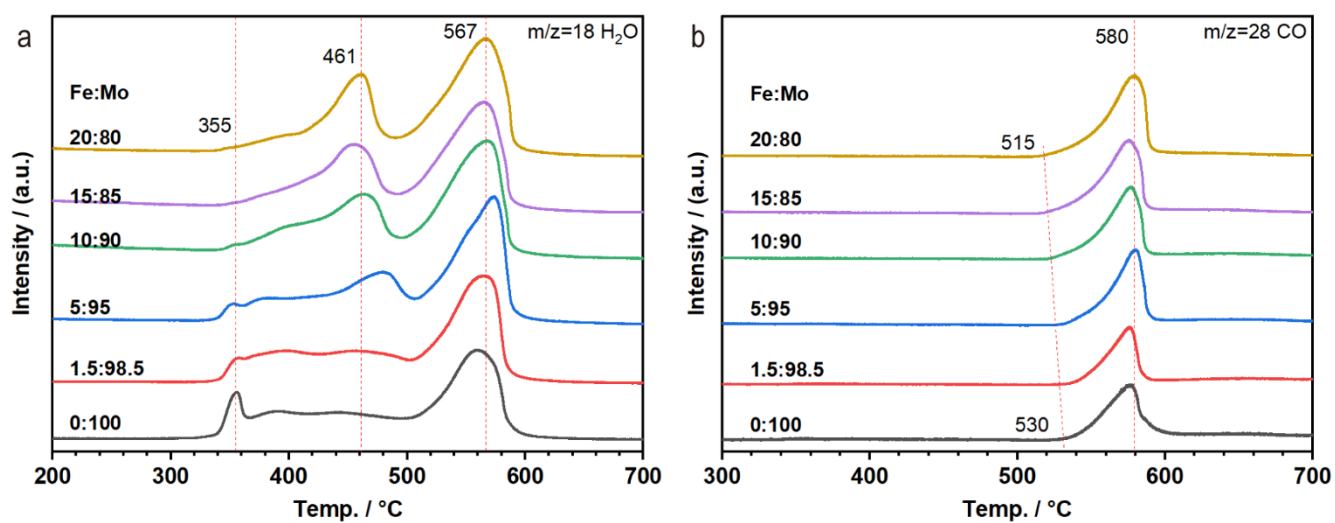

**Figure S3.** Temperature-programmed carburization of Fe-MoO<sub>3</sub> and using MS to detect the vent gas of (a) H<sub>2</sub>O (m/z=18) and (b) CO (m/z=28).

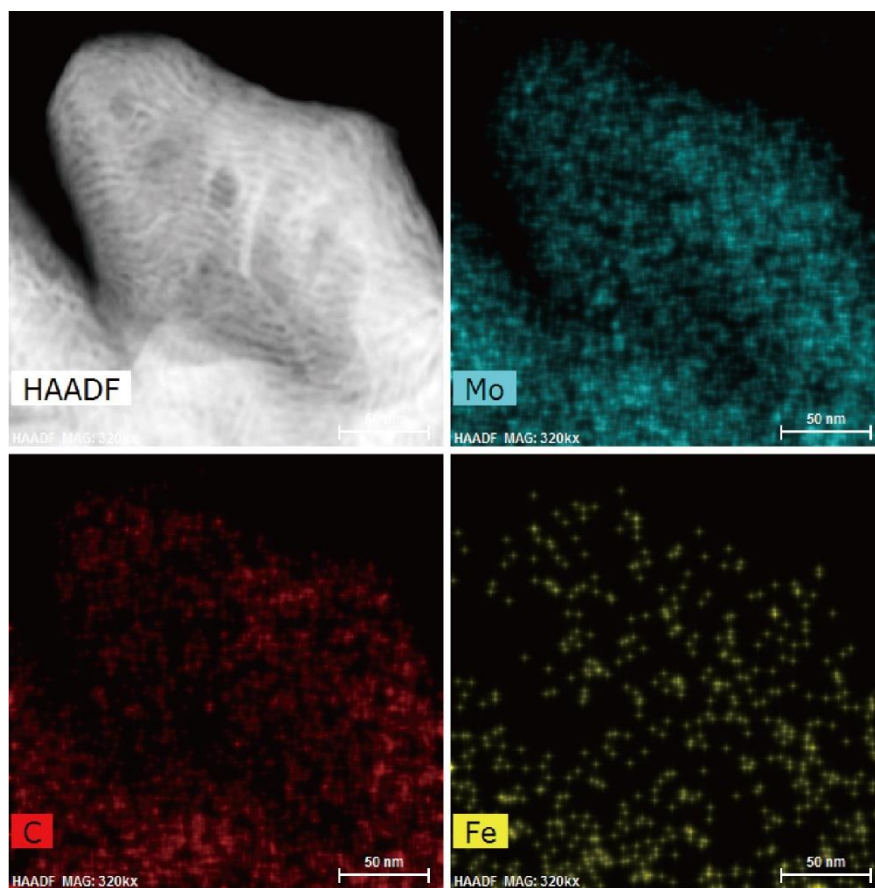

**Figure S4.** STEM image and corresponding element mapping picture of 1.5Fe- Mo<sub>2</sub>C-550.

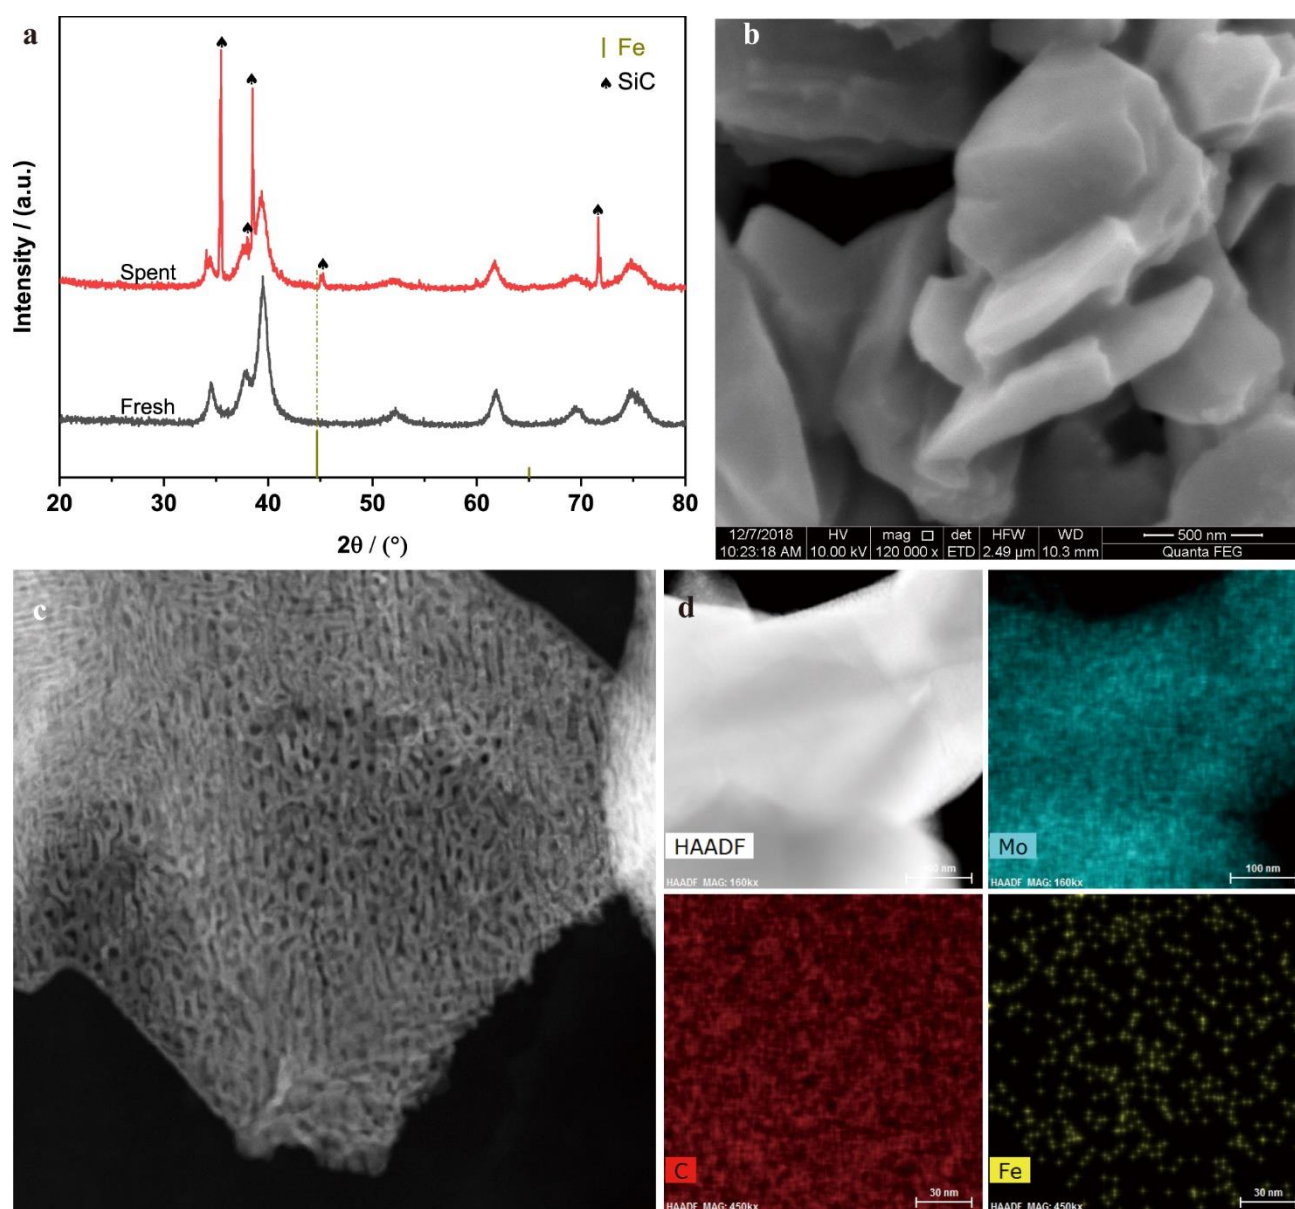

**Figure S5.** (a) XRD patterns of catalyst (1.5Fe-Mo<sub>2</sub>C-600) before and after the reaction, (b) SEM image of spent catalyst (1.5Fe-Mo<sub>2</sub>C-550), (c) STEM-HAADF image of spent catalyst (1.5Fe-Mo<sub>2</sub>C-550), and (d) STEM image and corresponding STEM-EDX element mapping image of spent catalyst (1.5Fe-Mo<sub>2</sub>C-550).

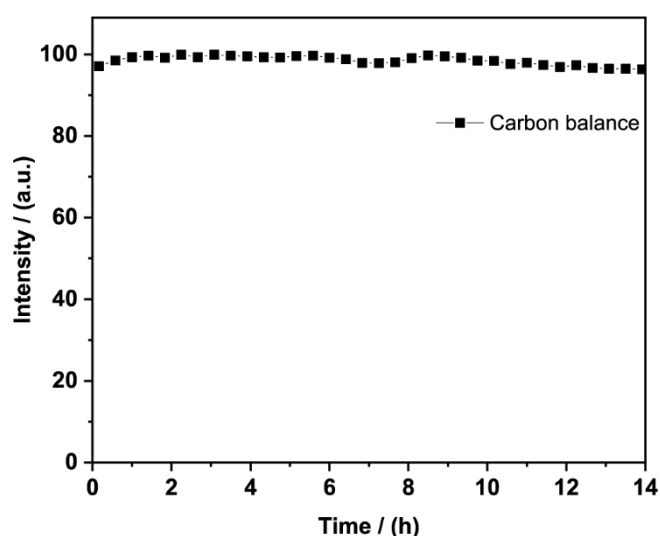

**Figure S6.** Carbon balance curve of during toluene hydrogenation using 1.5Fe-Mo<sub>2</sub>C-550 as catalyst. (3.0 MPa of total pressure, 100 °C as reaction temperature, 0.15 h<sup>-1</sup> as WHSV, employing newly synthesized Fe-doped molybdenum carbide catalysts).

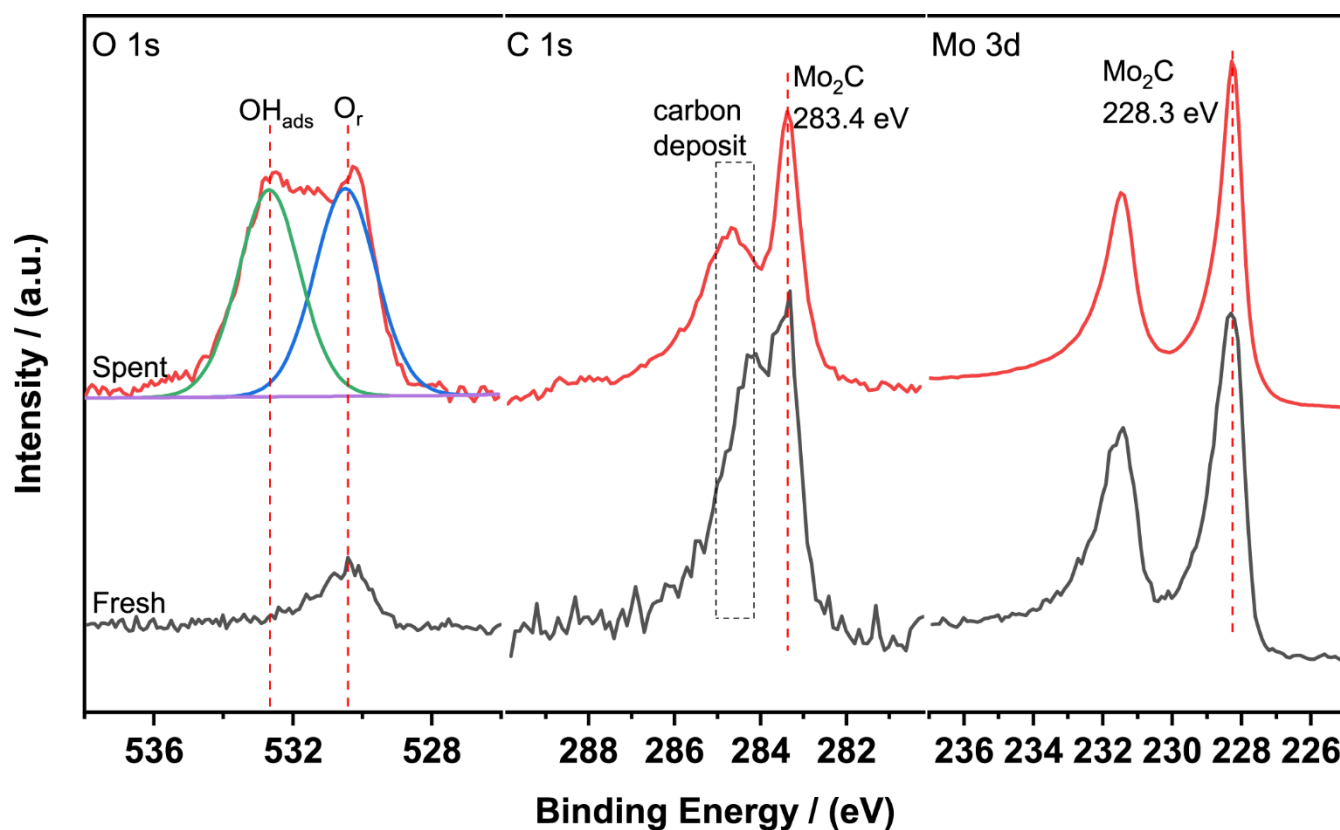

**Figure S7.** A control experiment using catalyst of 1.5Fe-Mo<sub>2</sub>C-550 for examining if surface of molybdenum carbide should be oxidized during transferring. The 1.5Fe-MoO<sub>3</sub> precursor was carburized in a fixed bed, which is identical one to the equipment used in toluene hydrogenation, at an atmosphere of 20% CH<sub>4</sub>/H<sub>2</sub>. After carburization, the reactor was sealed under pure N<sub>2</sub> atmosphere and consecutively transferred to glove box. The catalyst was pressed to a slice of 6 mm diameter in the glove box, and then the as-prepared sample was transferred to another glove box connected with XPS equipment load section using a sealed container avoiding the oxidation of catalyst by air. After that, the sample was loaded, vacuumed to UHV and transferred to analytic room for quasi in-situ XPS characterization.
